# Supplementary material
Source: PubMed Central journal article supplement (PMC3078967)
Supplement: NIHMS265070-supplement-01.pdf [file NIHMS265070-supplement-01.pdf]

## **SUPPORTING INFORMATION**

**Supplemental Table 1.** Summary of cotton VIGS efficiency with *GhCLA1* and *AtCLA1* constructs.

### **Supplemental Figure 1**

Amino acid sequence alignment of GhCLA1 and AtCLA1.

### **Supplemental Figure 2**

Leaf photobleaching phenotypes triggered by VIGS-GhCLA1 were shown on different cotton cultivars at different days post Agrobacteria-infiltration.

### **Supplemental Figure 3**

Leaf photobleaching phenotypes triggered by VIGS-AtCLA1 were shown on different cotton cultivars at 18 and 34 days post Agrobacteria-infiltration.

### **Supplemental Figure 4**

The gene expression of *GhVe1*, *GhNDR1*, *GhMKK2* and *GhNPR1* in plant stem tissues by RT-PCR analysis. *GhActin9* was used as a control.

Type of file: table

Label: Table S1

Filename: Supplemental Table 1.doc

**Supplemental Table 1.** Summary of cotton VIGS efficiency with *GhCLAI* and *AtCLAI* constructs

| <b>Cultivar</b>        | <b>VIGS gene</b> | <b>Bleaching phenotype</b> | <b>Ratio (Bleached plants/total plants)</b> | <b>Days post VIGS</b> | <b>Note</b>                                                                              |
|------------------------|------------------|----------------------------|---------------------------------------------|-----------------------|------------------------------------------------------------------------------------------|
| <b>Deltapine 90</b>    | <i>GhCLAI</i>    | Whole leaf                 | 100% (21/21)                                | 10 days               | 100% at 10 days post VIGS                                                                |
|                        | <i>AtCLAI</i>    | Leaf main vein             | 83% (5/6)                                   | 14 days               | 100% at 16 days post VIGS                                                                |
| <b>R135</b>            | <i>GhCLAI</i>    | Whole leaf                 | 86% (6/7)                                   | 12 days               | 100% at 14 days post VIGS Slightly weaker than other cultivars                           |
|                        | <i>AtCLAI</i>    |                            | 0/3                                         | 14 days               | No obvious bleaching phenotype                                                           |
| <b>Phytogen 480WR</b>  | <i>GhCLAI</i>    | Whole leaf                 | 100% (13/13)                                | 10 days               | 100% at 10 days post VIGS                                                                |
|                        | <i>AtCLAI</i>    | Leaf main vein             | 100% (5/5)                                  | 14 days               | 100% at 14 days post VIGS                                                                |
| <b>Phytogen 425 RF</b> | <i>GhCLAI</i>    | Whole leaf                 | 94% (15/16)                                 | 10 days               | 100% at 14 days post VIGS                                                                |
|                        | <i>AtCLAI</i>    | Leaf main vein             | 100% (10/10)                                | 14 days               | Slightly weaker than Deltapine 90 and 480WR. Some anthocyanin accumulated along the vein |
| <b>Fibermax 832</b>    | <i>GhCLAI</i>    | Whole leaf                 | 75% (3/4)                                   | 10 days               | 100% at 12 days post VIGS                                                                |
| <b>PSC355</b>          | <i>GhCLAI</i>    | Whole leaf                 | 88.9% (8/9)                                 | 10 days               | 100% at 14 days post VIGS                                                                |
